# Supplementary material for: Pet husbandry and infection control practices related to zoonotic disease risks in Ontario, Canada
Source: BMC Public Health. 2013 May 29;13:520. doi: 10.1186/1471-2458-13-520 (PMC3668296; doi:10.1186/1471-2458-13-520)
Supplement: Additional file 1 — Supplemental questionnaire for households with pets. [file 1471-2458-13-520-S1.pdf]

## Supplemental Questionnaire for Households with Pets

(If you do not currently have pets in your household please notify study recruiter)

For the purpose of this survey, “**household pets**” is loosely defined to include pets that are indoor only, outdoor only, and those that spend time both indoor and outdoor.

---

Questionnaire begins on the following page.

**1. Do you have one or more pet cats currently in your household (this includes cats that are indoor only, outdoor only, and those that spend time both indoor and outdoor)?** Yes ☐ (if ☒, please answer questions on this page)

No ☐ (if ☒, please proceed to next page)

a. How many household cats do you currently have? \_\_\_\_\_

# indoor only \_\_\_\_\_ # outdoor only \_\_\_\_\_ # spend time both indoor and outdoor \_\_\_\_\_ (on a leash outdoors? Yes ☐ No ☐)

|                                                                          | Yes | No | Don't Know |
|--------------------------------------------------------------------------|-----|----|------------|
| b. Are any of the cats declawed?                                         | Y   | N  | DK         |
| c. Have any of the cats ever bitten anyone?                              | Y   | N  | DK         |
| d. Have any of the cats ever scratched anyone?                           | Y   | N  | DK         |
| e. Are all the cats on a flea prevention program?                        | Y   | N  | DK         |
| f. Are all the cats on an intestinal parasite (worm) prevention program? | Y   | N  | DK         |
| g. Do any of the cats drink from the toilet bowl?                        | Y   | N  | DK         |
| h. Are any of the cats fed in the kitchen?                               | Y   | N  | DK         |
| i. Are any of the cats used for breeding?                                | Y   | N  | DK         |
| j. Do all the cats visit the veterinarian at least once per year?        | Y   | N  | DK         |

k. How often do any of the cats go to the bathroom outside of the litter box in the house?

Always ☐

Often ☐

Sometimes ☐

Never ☐

(at least once per week)

(less than once per week)

l. How often are the litter boxes cleaned, on average?

Daily ☐

Every several  
days ☐

Weekly ☐

Every 2  
weeks ☐

Greater than every  
2 weeks ☐

m. Please indicate which items are fed to any of the cats (check all that apply):

Commercial canned/dry food ☐

Raw eggs ☐

Home cooked pet food ☐

Raw animal product treats ☐

Home cooked human food (table scraps) ☐

Commercial processed pet treats ☐

Raw meat ☐

n. How would you describe your household's emotional attachment to the cat(s)?

Very attached ☐

Somewhat attached ☐

Not very attached ☐

Not at all attached ☐

o. If there are children under 16 years of age in your household, please answer the following questions:

|                                                                                                                                                                               | Yes                                    | No                                         | Don't Know                                   |
|-------------------------------------------------------------------------------------------------------------------------------------------------------------------------------|----------------------------------------|--------------------------------------------|----------------------------------------------|
| 1. Do any of the children ever clean the litter box(es)?                                                                                                                      | Y                                      | N                                          | DK                                           |
| If <u>Yes</u> ,                                                                                                                                                               |                                        |                                            |                                              |
| a. Do the children wear gloves when cleaning the litter box(es)?                                                                                                              | Y                                      | N                                          | DK                                           |
| b. Do the children wash their hands after cleaning the litter box(es)?                                                                                                        | Y                                      | N                                          | DK                                           |
| 2. Do any of the children have access to the litter box(es)?                                                                                                                  | Y                                      | N                                          | DK                                           |
| 3. Do any of the children touch one or more of the cat(s)?                                                                                                                    | Y                                      | N                                          | DK                                           |
| If <u>Yes</u> ,                                                                                                                                                               |                                        |                                            |                                              |
| a. How often do any of the cats sleep in one of the children's beds?                                                                                                          | Always <input type="checkbox"/>        | Usually <input type="checkbox"/>           | Sometimes <input type="checkbox"/>           |
|                                                                                                                                                                               |                                        | (3-6 nights/week)                          | (less than 3 nights/week)                    |
|                                                                                                                                                                               |                                        |                                            | Never <input type="checkbox"/>               |
| b. Do the children wash their hands after touching the cat(s)?                                                                                                                | Always <input type="checkbox"/>        | Usually <input type="checkbox"/>           | Sometimes <input type="checkbox"/>           |
|                                                                                                                                                                               |                                        |                                            | Never <input type="checkbox"/>               |
| 4. How would you describe the children's emotional attachment to the cat(s)? (If more than one child, how attached is the child with the closest relationship to the cat(s)?) | Very attached <input type="checkbox"/> | Somewhat attached <input type="checkbox"/> | Not very attached <input type="checkbox"/>   |
|                                                                                                                                                                               |                                        |                                            | Not at all attached <input type="checkbox"/> |

**2. Do you have one or more pet dogs currently in your household (this includes dogs that are outdoor only and those that spend time both indoor and outdoor)?** Yes [ ] (if ☒, please answer questions on this page)

No [ ] (if ☒, please proceed to next page)

a. How many household dogs do you currently have? \_\_\_\_\_

# outdoor only \_\_\_\_\_

# spend time both indoor and outdoor \_\_\_\_\_

|                                                                                                                | Yes                         | No                             | Don't Know                             |
|----------------------------------------------------------------------------------------------------------------|-----------------------------|--------------------------------|----------------------------------------|
| b. Have any of the dogs ever bitten anyone?                                                                    | Y                           | N                              | DK                                     |
| c. Are all the dogs on an intestinal parasite (worm) prevention program?                                       | Y                           | N                              | DK                                     |
| d. Are all the dogs on a flea prevention program?                                                              | Y                           | N                              | DK                                     |
| e. Are any of the dogs used for hunting?                                                                       | Y                           | N                              | DK                                     |
| f. Do any of the dogs drink from the toilet bowl?                                                              | Y                           | N                              | DK                                     |
| g. Are any of the dogs fed in the kitchen?                                                                     | Y                           | N                              | DK                                     |
| h. Are any of the dogs used for breeding?                                                                      | Y                           | N                              | DK                                     |
| i. Do all the dogs visit the veterinarian at least once per year?                                              | Y                           | N                              | DK                                     |
| j. Within the past 3 months, have any of your dogs been to any of the following places (check all that apply)? |                             |                                |                                        |
| On leash at a dog park [ ]                                                                                     | Off leash at a dog park [ ] | Doggie daycare or boarding [ ] | Dog sporting event (e.g., flyball) [ ] |

k. When outdoors, how often are the dogs either in a fenced yard or on a leash?

Always [ ]

Sometimes [ ]

Never [ ]

l. Please indicate which items are fed to any of the dogs (check all that apply):

Commercial canned/dry food [ ]

Raw eggs [ ]

Home cooked pet food [ ]

Raw animal product treats, such as pig's ears or rawhides [ ]

Home cooked human food (table scraps) [ ]

Commercial processed pet treats [ ]

Raw meat [ ]

m. How would you describe your household's emotional attachment to the dog(s)?

Very attached [ ]

Somewhat attached [ ]

Not very attached [ ]

Not at all attached [ ]

n. How often do any of the dogs inappropriately go to the bathroom in the house?

Always [ ]

Often [ ]

Sometimes [ ]

Never [ ]

(at least once per week)

(less than once per week)

o. If there are children under 16 years of age in your household, please answer the following questions:

|                                                                                                                                                                               | Yes                      | No                        | Don't Know              |
|-------------------------------------------------------------------------------------------------------------------------------------------------------------------------------|--------------------------|---------------------------|-------------------------|
| 1. Do any of the children ever clean-up the dog's feces?                                                                                                                      | Y                        | N                         | DK                      |
| If Yes,                                                                                                                                                                       |                          |                           |                         |
| a. Do the children wear gloves or use a scooper?                                                                                                                              | Y                        | N                         | DK                      |
| b. Do the children wash their hands after cleaning-up the dog's feces?                                                                                                        | Y                        | N                         | DK                      |
| 2. Do any of the children play in the same area as where the dog(s) go to the bathroom                                                                                        | Y                        | N                         | DK                      |
| a. If Yes, how often are feces removed?                                                                                                                                       |                          |                           |                         |
| Immediately [ ]                                                                                                                                                               | Daily [ ]                | Weekly [ ]                | Greater than weekly [ ] |
| 3. Do any of the children touch one or more of the dog(s)                                                                                                                     | Y                        | N                         | DK                      |
| If Yes,                                                                                                                                                                       |                          |                           |                         |
| a. How often do any of the dogs sleep in one of the children's beds?                                                                                                          |                          |                           |                         |
| Always [ ]                                                                                                                                                                    | Usually [ ]              | Sometimes [ ]             | Never [ ]               |
|                                                                                                                                                                               | (3-6 nights/week)        | (less than 3 nights/week) |                         |
| b. Do the children wash their hands after touching the dog(s)?                                                                                                                |                          |                           |                         |
| Always [ ]                                                                                                                                                                    | Usually [ ]              | Sometimes [ ]             | Never [ ]               |
| c. How often do any of the dogs lick one of the children's faces?                                                                                                             |                          |                           |                         |
| Daily [ ]                                                                                                                                                                     | Often [ ]                | Sometimes [ ]             | Never [ ]               |
|                                                                                                                                                                               | (several times per week) |                           |                         |
| 4. How would you describe the children's emotional attachment to the dog(s)? (If more than one child, how attached is the child with the closest relationship to the dog(s)?) |                          |                           |                         |
| Very attached [ ]                                                                                                                                                             | Somewhat attached [ ]    | Not very attached [ ]     | Not at all attached [ ] |

**3. Do you have one or more reptiles (e.g., snake, lizard, turtle) or amphibians (e.g., frog, toad, salamander) currently in your household?**

Yes ☐ (if ☒, please answer questions on this page)

No ☐ (if ☒, please proceed to next page)

a. Indicate what type(s) and number of reptiles and amphibians are currently in your household:

| Species              | Number |
|----------------------|--------|
| Lizard               |        |
| Turtle               |        |
| Snake                |        |
| Frog/toad            |        |
| Salamander           |        |
| Other (please list): |        |

|                                                                                                                                                                                                                                                                              | Yes | No | Don't Know |
|------------------------------------------------------------------------------------------------------------------------------------------------------------------------------------------------------------------------------------------------------------------------------|-----|----|------------|
| 1. Are any of the animals allowed to roam freely through the house?                                                                                                                                                                                                          | Y   | N  | DK         |
| 2. Are any of the animals allowed to roam in the kitchen?                                                                                                                                                                                                                    | Y   | N  | DK         |
| 3. Are any of the cages or animals washed in the kitchen sink?                                                                                                                                                                                                               | Y   | N  | DK         |
| 4. Are any of the cages or animals washed in the bathtub or bathroom sink?                                                                                                                                                                                                   | Y   | N  | DK         |
| 5. How often is the cage cleaned, on average (choose one)?<br>Daily <input type="checkbox"/> Every several days <input type="checkbox"/> Weekly <input type="checkbox"/> Every 2 weeks <input type="checkbox"/> Greater than every 2 weeks <input type="checkbox"/>          |     |    |            |
| 6. How would you describe your household's emotional attachment to the reptile(s)/amphibian(s)?<br>Very attached <input type="checkbox"/> Somewhat attached <input type="checkbox"/> Not very attached <input type="checkbox"/> Not at all attached <input type="checkbox"/> |     |    |            |

7. If there are children under 16 years of age in your household, please answer the following questions:

|                                                                                                                                                                                                                                                                                                                                                                                              | Yes | No | Don't Know |
|----------------------------------------------------------------------------------------------------------------------------------------------------------------------------------------------------------------------------------------------------------------------------------------------------------------------------------------------------------------------------------------------|-----|----|------------|
| a. Do any of the children ever clean the animal's cage?                                                                                                                                                                                                                                                                                                                                      | Y   | N  | DK         |
| If <u>Yes</u> ,                                                                                                                                                                                                                                                                                                                                                                              |     |    |            |
| 1. Do the children wear gloves?                                                                                                                                                                                                                                                                                                                                                              | Y   | N  | DK         |
| 2. Do the children wash their hands after cleaning the animal's cage?                                                                                                                                                                                                                                                                                                                        | Y   | N  | DK         |
| b. Are any of the animals allowed to roam in the children's room?                                                                                                                                                                                                                                                                                                                            | Y   | N  | DK         |
| c. Do any of the children touch any of these animal(s)?                                                                                                                                                                                                                                                                                                                                      | Y   | N  | DK         |
| If <u>Yes</u> , do the children wash their hands after touching the animals?                                                                                                                                                                                                                                                                                                                 |     |    |            |
| Always <input type="checkbox"/> Usually <input type="checkbox"/> Sometimes <input type="checkbox"/> Never <input type="checkbox"/>                                                                                                                                                                                                                                                           |     |    |            |
| d. How would you describe the children's emotional attachment to the reptile(s)/amphibian(s)? (If more than one child, how attached is the child with the closest relationship to the reptile(s)/amphibian(s)?)<br>Very attached <input type="checkbox"/> Somewhat attached <input type="checkbox"/> Not very attached <input type="checkbox"/> Not at all attached <input type="checkbox"/> |     |    |            |

**4. Do you have one or more pet fish currently in your household?**

Yes [ ] (if ☒, please answer questions on this page)

No [ ] (if ☒, please proceed to next page)

a. How many fish do you have in your household? \_\_\_\_\_

|                                                                              |                        |                       |                         |                                |           |
|------------------------------------------------------------------------------|------------------------|-----------------------|-------------------------|--------------------------------|-----------|
| b. How often is the aquarium cleaned, on average?                            |                        |                       |                         |                                |           |
| Daily [ ]                                                                    | Every several days [ ] | Weekly [ ]            | Every 2 weeks [ ]       | Greater than every 2 weeks [ ] |           |
| c. Where do you dump aquarium water (check all that apply)?                  |                        |                       |                         |                                |           |
| Toilet [ ]                                                                   | Bathtub or shower [ ]  | Kitchen Sink [ ]      | Bathroom Sink [ ]       | Outside [ ]                    | Other [ ] |
| d. How would you describe your household's emotional attachment to the fish? |                        |                       |                         |                                |           |
| Very attached [ ]                                                            | Somewhat attached [ ]  | Not very attached [ ] | Not at all attached [ ] |                                |           |

e. If there are children in your household under 16 years of age, please answer the following questions:

|                                                                                                                                                                           |                       |                       |                         |
|---------------------------------------------------------------------------------------------------------------------------------------------------------------------------|-----------------------|-----------------------|-------------------------|
|                                                                                                                                                                           | Yes                   | No                    | Don't Know              |
| 1. Do any of the children ever clean the aquarium?                                                                                                                        | Y                     | N                     | DK                      |
| If <u>Yes</u> ,                                                                                                                                                           |                       |                       |                         |
| a. Do the children wear gloves?                                                                                                                                           | Y                     | N                     | DK                      |
| b. Do the children wash their hands after cleaning the aquarium?                                                                                                          | Y                     | N                     | DK                      |
| 2. Do any of the children ever touch the fish or aquarium water?                                                                                                          | Y                     | N                     | DK                      |
| If <u>Yes</u> , do the children wash their hands after touching the fish or aquarium water?                                                                               |                       |                       |                         |
| Always [ ]                                                                                                                                                                | Usually [ ]           | Sometimes [ ]         | Never [ ]               |
| 3. How would you describe the children's emotional attachment to the fish? (If more than one child, how attached is the child with the closest relationship to the fish?) |                       |                       |                         |
| Very attached [ ]                                                                                                                                                         | Somewhat attached [ ] | Not very attached [ ] | Not at all attached [ ] |

**5. Do you have one or more pet birds, rabbits, ferrets, hedgehogs, or rodents (such as gerbils, hamsters, guinea pigs, mice, and rats) currently in your household?**

Yes [ ] (if ☒, please answer questions on this page)

No [ ] (if ☒, please proceed to next page)

a. Indicate below what type(s) and number of birds, rabbits, ferrets, hedgehogs, or rodents are currently in your household:

| Species                  | Number |
|--------------------------|--------|
| Bird (indicate species): |        |
| Rabbit                   |        |
| Ferret                   |        |
| Hedgehog                 |        |
| Gerbil                   |        |
| Hamster                  |        |
| Guinea Pig               |        |
| Rat/mouse                |        |
| Other (please list):     |        |

b. If **birds** are currently in your household, please answer the following questions:

|                                                                                                                                                                               |                        |                       |                         |
|-------------------------------------------------------------------------------------------------------------------------------------------------------------------------------|------------------------|-----------------------|-------------------------|
| 1. How often is the cage cleaned, on average?                                                                                                                                 |                        |                       |                         |
| Daily [ ]                                                                                                                                                                     | Every several days [ ] | Weekly [ ]            | Every 2 weeks [ ]       |
| Greater than every 2 weeks [ ]                                                                                                                                                |                        |                       |                         |
| 2. How would you describe your household's emotional attachment to the birds?                                                                                                 |                        |                       |                         |
| Very attached [ ]                                                                                                                                                             | Somewhat attached [ ]  | Not very attached [ ] | Not at all attached [ ] |
| 3. If there are children in your household under 16 years of age, please answer the following questions:                                                                      |                        |                       |                         |
|                                                                                                                                                                               |                        |                       | Yes                     |
|                                                                                                                                                                               |                        |                       | No                      |
|                                                                                                                                                                               |                        |                       | Don't Know              |
| a. Do any of the children ever clean the bird's cage?                                                                                                                         |                        |                       |                         |
|                                                                                                                                                                               |                        |                       | Y                       |
|                                                                                                                                                                               |                        |                       | N                       |
|                                                                                                                                                                               |                        |                       | DK                      |
| If Yes,                                                                                                                                                                       |                        |                       |                         |
| 1. Do the children wear gloves?                                                                                                                                               |                        |                       |                         |
|                                                                                                                                                                               |                        |                       | Y                       |
|                                                                                                                                                                               |                        |                       | N                       |
|                                                                                                                                                                               |                        |                       | DK                      |
| 2. Do the children wash their hands after cleaning the bird's cage?                                                                                                           |                        |                       |                         |
|                                                                                                                                                                               |                        |                       | Y                       |
|                                                                                                                                                                               |                        |                       | N                       |
|                                                                                                                                                                               |                        |                       | DK                      |
| b. Do any of the children touch any of the birds?                                                                                                                             |                        |                       |                         |
|                                                                                                                                                                               |                        |                       | Y                       |
|                                                                                                                                                                               |                        |                       | N                       |
|                                                                                                                                                                               |                        |                       | DK                      |
| If Yes,                                                                                                                                                                       |                        |                       |                         |
| 1. Do the children wash their hands after touching the birds?                                                                                                                 |                        |                       |                         |
| Always [ ]                                                                                                                                                                    |                        |                       | Usually [ ]             |
| Sometimes [ ]                                                                                                                                                                 |                        |                       | Never [ ]               |
| c. How would you describe the children's emotional attachment to the birds? (If more than one child, how attached is the child with the closest relationship to the bird(s)?) |                        |                       |                         |
| Very attached [ ]                                                                                                                                                             | Somewhat attached [ ]  | Not very attached [ ] | Not at all attached [ ] |

c. If **rabbits, ferrets, hedgehogs, or rodents** (such as gerbils, hamsters, guinea pigs, mice, and rats) are currently in your household, please answer the following questions:

|                                                                                                                                                                                     |                        |                       |                         |
|-------------------------------------------------------------------------------------------------------------------------------------------------------------------------------------|------------------------|-----------------------|-------------------------|
| 1. How often is the cage cleaned, on average?                                                                                                                                       |                        |                       |                         |
| Daily [ ]                                                                                                                                                                           | Every several days [ ] | Weekly [ ]            | Every 2 weeks [ ]       |
| Greater than every 2 weeks [ ]                                                                                                                                                      |                        |                       |                         |
| 2. How would you describe your household's emotional attachment to these animals?                                                                                                   |                        |                       |                         |
| Very attached [ ]                                                                                                                                                                   | Somewhat attached [ ]  | Not very attached [ ] | Not at all attached [ ] |
| 3. If there are children in your household under 16 years of age, please answer the following questions:                                                                            |                        |                       |                         |
|                                                                                                                                                                                     |                        |                       | Yes                     |
|                                                                                                                                                                                     |                        |                       | No                      |
|                                                                                                                                                                                     |                        |                       | Don't Know              |
| a. Do any of the children ever clean the animal's cage?                                                                                                                             |                        |                       |                         |
|                                                                                                                                                                                     |                        |                       | Y                       |
|                                                                                                                                                                                     |                        |                       | N                       |
|                                                                                                                                                                                     |                        |                       | DK                      |
| If Yes,                                                                                                                                                                             |                        |                       |                         |
| 1. Do the children wear gloves?                                                                                                                                                     |                        |                       |                         |
|                                                                                                                                                                                     |                        |                       | Y                       |
|                                                                                                                                                                                     |                        |                       | N                       |
|                                                                                                                                                                                     |                        |                       | DK                      |
| 2. Do the children wash their hands after cleaning the cage?                                                                                                                        |                        |                       |                         |
|                                                                                                                                                                                     |                        |                       | Y                       |
|                                                                                                                                                                                     |                        |                       | N                       |
|                                                                                                                                                                                     |                        |                       | DK                      |
| b. Do any of the children touch any of these animals?                                                                                                                               |                        |                       |                         |
|                                                                                                                                                                                     |                        |                       | Y                       |
|                                                                                                                                                                                     |                        |                       | N                       |
|                                                                                                                                                                                     |                        |                       | DK                      |
| If Yes, do the children wash their hands after touching these animals?                                                                                                              |                        |                       |                         |
| Always [ ]                                                                                                                                                                          |                        |                       | Usually [ ]             |
| Sometimes [ ]                                                                                                                                                                       |                        |                       | Never [ ]               |
| c. How would you describe the children's emotional attachment to these animals? (If more than one child, how attached is the child with the closest relationship to these animals?) |                        |                       |                         |
| Very attached [ ]                                                                                                                                                                   | Somewhat attached [ ]  | Not very attached [ ] | Not at all attached [ ] |

**6. Do you currently live on a farm (e.g., have livestock, horses, or poultry on your property)?**

Yes ☐ (if ☒, please answer questions on this page)

No ☐ (if ☒, please proceed to next page)

a. Please indicate the types of animals and number currently present:

| Type of animal      | Number |
|---------------------|--------|
| Horse(s)            |        |
| Cattle (beef)       |        |
| Cattle (dairy)      |        |
| Pig(s)              |        |
| Chicken(s)          |        |
| Duck(s)/turkey(s)   |        |
| Goat(s)             |        |
| Sheep               |        |
| Alpaca(s)/ llama(s) |        |
| Other (list):       |        |
| Other (list):       |        |

b. If there are children in your household under 16 years of age, please answer the following questions:

|                                                                                                                 |                                 |                                  |                                    |                                |
|-----------------------------------------------------------------------------------------------------------------|---------------------------------|----------------------------------|------------------------------------|--------------------------------|
| 1. How often do any of the children help feed any of the animals?                                               | Always <input type="checkbox"/> | Usually <input type="checkbox"/> | Sometimes <input type="checkbox"/> | Never <input type="checkbox"/> |
| 2. How often do any of the children help clean-up the animal(s) or their stalls/pens?                           | Always <input type="checkbox"/> | Usually <input type="checkbox"/> | Sometimes <input type="checkbox"/> | Never <input type="checkbox"/> |
| 3. If the children touch one or more of the farm animals or its stall/pen, do they wash their hands afterwards? | Always <input type="checkbox"/> | Usually <input type="checkbox"/> | Sometimes <input type="checkbox"/> | Never <input type="checkbox"/> |
